# Supplementary material for: Rodent Ectoparasites in the Middle East: A Systematic Review and Meta-Analysis
Source: MDPI journal article supplement (doi:10.3390/pathogens10020139), 2021-01-31
Supplement: s1 [file s1]

# Rodent Ectoparasites in the Middle East: A Systematic Review and Meta-Analysis

Supplementary Table S4: Rodents, fleas, lice, mites, and ticks prevailing on rodents in the Middle East

Supplementary Table S4a: Rodents in the Middle East

|                                                                                                                                                                                                                                                                                                                                                                                                                                                                                                                                                                                                                                                                                                                                                                                                                                                                                                                                                                                                                                                                                                                                                                                                                                                                                                                                                                                                                                                                                                                                                                                                                                                                                                                                                                                                                                                                                                                                                                                                                                                                                                                                       |
|---------------------------------------------------------------------------------------------------------------------------------------------------------------------------------------------------------------------------------------------------------------------------------------------------------------------------------------------------------------------------------------------------------------------------------------------------------------------------------------------------------------------------------------------------------------------------------------------------------------------------------------------------------------------------------------------------------------------------------------------------------------------------------------------------------------------------------------------------------------------------------------------------------------------------------------------------------------------------------------------------------------------------------------------------------------------------------------------------------------------------------------------------------------------------------------------------------------------------------------------------------------------------------------------------------------------------------------------------------------------------------------------------------------------------------------------------------------------------------------------------------------------------------------------------------------------------------------------------------------------------------------------------------------------------------------------------------------------------------------------------------------------------------------------------------------------------------------------------------------------------------------------------------------------------------------------------------------------------------------------------------------------------------------------------------------------------------------------------------------------------------------|
| <p><b>1. Family: Calomyscidae</b></p> <p><i>Calomyscus bailwardi</i> (Iran), <i>Calomyscus elburzensis</i> (Iran), <i>Calomyscus hotsoni</i> (Iran), <i>Calomyscus</i> sp. (Iran)</p>                                                                                                                                                                                                                                                                                                                                                                                                                                                                                                                                                                                                                                                                                                                                                                                                                                                                                                                                                                                                                                                                                                                                                                                                                                                                                                                                                                                                                                                                                                                                                                                                                                                                                                                                                                                                                                                                                                                                                 |
| <p><b>2. Family: Cricetidae</b></p> <p><i>Arvicola amphibius</i> (Iran), <i>Chionomys nivalis</i> (Iran, Turkey), <i>Chionomys</i> sp. (Iran), <i>Clethrionomys</i> sp. (Iran), <i>Cricetulus migratorius</i> (Iran, Lebanon, Turkey), <i>Ellobius fuscocapillus</i> (Iran), <i>Mesocricetus auratus</i> (Turkey), <i>Mesocricetus brandti</i> (Turkey), <i>Microtus arvalis</i> (Turkey), <i>Microtus guentheri</i> (Lebanon, Turkey), <i>Microtus levis</i> (Turkey), <i>Microtus majori</i> (Turkey), <i>Microtus mystacinus</i> (Iran), <i>Microtus paradoxus</i> (Iran), <i>Microtus qazvinensis</i> (Iran), <i>Microtus socialis</i> (Iran, Israel), <i>Microtus</i> sp. (Iran, Turkey), <i>Microtus subterraneus</i> (Turkey), <i>Microtus transcaspicus</i> (Iran), <i>Myodes glareolus</i> (Turkey), <i>Prometheomys schaposchnikowi</i> (Turkey)</p>                                                                                                                                                                                                                                                                                                                                                                                                                                                                                                                                                                                                                                                                                                                                                                                                                                                                                                                                                                                                                                                                                                                                                                                                                                                                        |
| <p><b>3. Family: Dipodidae</b></p> <p><i>Jaculus blanfordi</i> (Iran), <i>Jaculus jaculus</i> (Egypt, Israel, Saudi Arabia), <i>Jaculus orientalis</i> (Egypt), <i>Scarturus elater</i> (Iran), <i>Scarturus migratorius</i> (Iran), <i>Scarturus</i> sp. (Iran), <i>Scarturus tetradactyla</i> (Egypt), <i>Sciurus anomalus</i> (Iran, Lebanon)</p>                                                                                                                                                                                                                                                                                                                                                                                                                                                                                                                                                                                                                                                                                                                                                                                                                                                                                                                                                                                                                                                                                                                                                                                                                                                                                                                                                                                                                                                                                                                                                                                                                                                                                                                                                                                  |
| <p><b>4. Family: Gliridae</b></p> <p><i>Dryomys nitedula</i> (Iran), <i>Eliomys melanurus</i> (Egypt, Israel), <i>Eliomys quercinus</i> (Egypt)</p>                                                                                                                                                                                                                                                                                                                                                                                                                                                                                                                                                                                                                                                                                                                                                                                                                                                                                                                                                                                                                                                                                                                                                                                                                                                                                                                                                                                                                                                                                                                                                                                                                                                                                                                                                                                                                                                                                                                                                                                   |
| <p><b>5. Family: Muridae</b></p> <p><i>Acomys cahirinus</i> (Egypt, Iran, Israel), <i>Acomys dimidiatus</i> (Egypt, Iran, Saudi Arabia), <i>Acomys russatus</i> (Egypt, Israel), <i>Apodemus agrarius</i> (Turkey), <i>Apodemus flavicollis</i> (Iran, Turkey), <i>Apodemus mystacinus</i> (Iran, Lebanon, Turkey), <i>Apodemus ponticus</i> (Iran), <i>Apodemus</i> spp. (Iran, Turkey), <i>Apodemus sylvaticus</i> (Iran, Israel, Lebanon, Turkey), <i>Apodemus uralensis</i> (Turkey), <i>Apodemus witherbyi</i> (Iran, Turkey), <i>Arvicanthis niloticus</i> (Egypt), <i>Dipodillus dasyurus</i> (Egypt, Israel), <i>Gerbillus andersoni</i> (Israel), <i>Gerbillus cheesmani</i> (Iran, Saudi Arabia), <i>Gerbillus dasyurus</i> (Israel), <i>Gerbillus gerbillus</i> (Egypt, Israel), <i>Gerbillus henleyi</i> (Israel), <i>Gerbillus nanus</i> (Iran, Israel, Saudi Arabia), <i>Gerbillus pyramidum</i> (Egypt, Israel), <i>Gerbillus</i> spp. (Saudi Arabia), <i>Golunda ellioti</i> (Iran), <i>Meriones crassus</i> (Egypt, Iran, Israel), <i>Meriones hurrianae</i> (Iran), <i>Meriones libycus</i> (Iran, Saudi Arabia, Turkey), <i>Meriones meridianus</i> (Iran), <i>Meriones nivalis</i> (Lebanon), <i>Meriones persicus</i> (Iran, Turkey), <i>Meriones rex</i> (Egypt, Saudi Arabia), <i>Meriones sacramenti</i> (Israel), <i>Meriones</i> spp. (Iran, Saudi Arabia, Turkey), <i>Meriones tamariscinus</i> (Iran), <i>Meriones tristrami</i> (Iran, Israel, Lebanon, Turkey), <i>Meriones vinogradovi</i> (Iran), <i>Mus macedonicus</i> (Iran, Turkey), <i>Mus musculus</i> (Cyprus, Egypt, Iran, Israel, Saudi Arabia, Turkey), <i>Mus spicilegus</i> (Iran), <i>Psammomys obesus</i> (Israel), <i>Nesokia indica</i> (Iran), <i>Rattus norvegicus</i> (Cyprus, Egypt, Iran, Israel, Kuwait, Lebanon, Qatar, Saudi Arabia), <i>Rattus pyctoris</i> (Iran), <i>Rattus rattus</i> (Cyprus, Egypt, Iran, Israel, Lebanon, Palestine, Saudi Arabia, Turkey), <i>Rhombomys opimus</i> (Iran), <i>Tatera indica</i> (Iran, Turkey), <i>Myomyscus Yemeni</i> (Saudi Arabia), <i>Sekeetamys calurus</i> (Egypt, Israel)</p> |

---

6. **Family:** Sciuridae

*Sciurus anomalus* (Iran, Lebanon)

---

7. **Family:** Spalacidae

*Nannospalax xanthodon* (Turkey), *Spalax leucodon* (Turkey). *Spermophilus citellus* (Turkey),  
*Spermophilus fulvus* (Iran)

---

**Supplementary Table S4b: Rodent fleas reported in the Middle East**

|                                                                                                                                                                                                                                                                                                                                                                                                                                                                                                                                                                                                                                                                                                                                                                                                                                                                                                                                                                                                                                                                                                                                                                                                                                                                                                                                                                                                                  |
|------------------------------------------------------------------------------------------------------------------------------------------------------------------------------------------------------------------------------------------------------------------------------------------------------------------------------------------------------------------------------------------------------------------------------------------------------------------------------------------------------------------------------------------------------------------------------------------------------------------------------------------------------------------------------------------------------------------------------------------------------------------------------------------------------------------------------------------------------------------------------------------------------------------------------------------------------------------------------------------------------------------------------------------------------------------------------------------------------------------------------------------------------------------------------------------------------------------------------------------------------------------------------------------------------------------------------------------------------------------------------------------------------------------|
| <b>1. Family: Ceratophyllidae</b><br><i>Callopsylla caspia</i> (Lebanon), <i>Ceratophyllus hirundinis</i> (Lebanon), <i>Megabothris turbidus</i> (Turkey), <i>Myoxopsylla laverani</i> (Egypt, Israel), <i>Nosopsyllus baltazardi</i> (Iran), <i>Nosopsyllus consimilis</i> (Turkey), <i>Nosopsyllus durii</i> (Lebanon, Turkey), <i>Nosopsyllus fasciatus</i> (Cyprus, Egypt, Iran, Turkey), <i>Nosopsyllus geneatus</i> (Egypt), <i>Nosopsyllus gerbilophilus</i> (Egypt), <i>Nosopsyllus henleyi</i> (Egypt), <i>Nosopsyllus iranensis</i> (Iran, Israel, Lebanon, Saudi Arabia), <i>Nosopsyllus laeviceps</i> (Iran), <i>Nosopsyllus londiniensis</i> (Egypt), <i>Nosopsyllus medus</i> (Iran), <i>Nosopsyllus penicus</i> (Egypt), <i>Nosopsyllus pringlei</i> (Iran), <i>Nosopsyllus pumilionis</i> (Israel), <i>Nosopsyllus sarinus</i> (Turkey), <i>Nosopsyllus sinaiensis</i> (Egypt), <i>Nosopsyllus</i> spp. (Egypt, Iran), <i>Nosopsyllus theodori</i> (Israel), <i>Nosopsyllus turkmenicus</i> (Iran), <i>Nosopsyllus vlasovi</i> (Iran), <i>Nosopsyllus ziarus</i> (Iran), <i>Paraceras melis</i> (Iran), <i>Paraceras</i> sp. (Iran)                                                                                                                                                                                                                                                              |
| <b>2. Family: Coptopsyllidae</b><br><i>Coptopsylla Africana</i> (Israel), <i>Coptopsylla bairamalienis</i> (Iran), <i>Coptopsylla iranica</i> (Iran), <i>Coptopsylla lamellifer</i> (Iran), <i>Coptopsylla mesghalii</i> (Iran), <i>Coptopsylla mofidii</i> (Iran), <i>Coptopsylla neronovi</i> (Iran)                                                                                                                                                                                                                                                                                                                                                                                                                                                                                                                                                                                                                                                                                                                                                                                                                                                                                                                                                                                                                                                                                                           |
| <b>3. Family: Ctenophthalmidae</b><br><i>Ctenophthalmus agyrtes</i> (Turkey), <i>Ctenophthalmus bifidatus</i> (Turkey), <i>Ctenophthalmus congener</i> (Lebanon), <i>Ctenophthalmus coniunctus</i> (Turkey), <i>Ctenophthalmus contiger</i> (Turkey), <i>Ctenophthalmus dolichus</i> (Iran), <i>Ctenophthalmus euxinicus</i> (Turkey), <i>Ctenophthalmus fissurus</i> (Turkey), <i>Ctenophthalmus fransmiti</i> (Turkey), <i>Ctenophthalmus golovi</i> (Turkey), <i>Ctenophthalmus harputus</i> (Turkey), <i>Ctenophthalmus hypanis</i> (Turkey), <i>Ctenophthalmus inornatus</i> (Turkey), <i>Ctenophthalmus iranensis</i> (Iran), <i>Ctenophthalmus Proximus</i> (Turkey), <i>Ctenophthalmus reconditus</i> (Turkey), <i>Ctenophthalmus rettigi</i> (Iran), <i>Ctenophthalmus secundus</i> (Turkey), <i>Ctenophthalmus</i> sp. (Iran), <i>Ctenophthalmus stirps</i> (Turkey), <i>Ctenophthalmus teres</i> (Turkey), <i>Ctenophthalmus beyzanuræ</i> (Turkey), <i>Ctenophthalmus kefelioglu</i> (Turkey), <i>Hystrichopsylla orientalis</i> (Turkey), <i>Palaeopsylla incisa</i> (Turkey), <i>Rhadinopsylla bivirgis</i> (Iran), <i>Rhadinopsylla masculana</i> (Egypt, Israel), <i>Rhadinopsylla pentacantha</i> (Turkey), <i>Rhadinopsylla syriaca</i> (Iran), <i>Rhadinopsylla ucrainica</i> (Iran), <i>Stenoponia tripectinata</i> (Egypt, Iran, Israel, Lebanon, Turkey), <i>Stenoponia vlasovi</i> (Iran) |
| <b>4. Family: Leptopsyllidae</b><br><i>Amphipsylla rossica</i> (Iran, Turkey), <i>Amphipsylla</i> spp. (Iran), <i>Ctenophyllus rufescens</i> (Iran), <i>Frontopsylla elata</i> (Turkey), <i>Hopkinsipsylla occulta</i> (Egypt), <i>Leptopsylla aethiopicus</i> (Iran), <i>Leptopsylla algira</i> (Israel), <i>Leptopsylla segnis</i> (Cyprus, Egypt, Iran, Lebanon), <i>Leptopsylla taschenbergi</i> (Iran, Lebanon, Turkey), <i>Mesopsylla tuschkan</i> (Egypt), <i>Ophthalmopsylla volgensis</i> (Israel), <i>Paradoxopsyllus grenieri</i> (Iran), <i>Paradoxopsyllus microphthalmos</i> (Iran)                                                                                                                                                                                                                                                                                                                                                                                                                                                                                                                                                                                                                                                                                                                                                                                                                |
| <b>5. Family: Pulicidae</b><br><i>Ctenocephalides arabis</i> (Egypt), <i>Ctenocephalides canis</i> (Cyprus, Egypt), <i>Ctenocephalides felis</i> (Cyprus, Egypt, Iran, Lebanon, Saudi Arabia), <i>Echidnophaga gallinacea</i> (Egypt), <i>Echidnophaga murina</i> (Egypt, Israel, Lebanon), <i>Echidnophaga oschanini</i> (Iran), <i>Parapulex chephrenis</i> (Egypt, Israel, Saudi Arabia, Yemen), <i>Pulex irritans</i> (Egypt, Iran, Israel, Turkey), <i>Synosternus pallidus</i> (Egypt), <i>Xenopsylla astia</i> (Egypt, Iran, Kuwait, Qatar), <i>Xenopsylla buxtoni</i> (Iran), <i>Xenopsylla cheopis</i> (Cyprus, Egypt, Iran, Israel, Lebanon, Palestine, Saudi Arabia, Yemen), <i>Xenopsylla cleopatrae</i> (Egypt, Iran, Israel, Saudi Arabia, Yemen), <i>Xenopsylla conformis</i> (Egypt, Iran, Israel, Saudi Arabia), <i>Xenopsylla dipodilli</i> (Egypt, Israel), <i>Xenopsylla gerbilli</i> (Iran), <i>Xenopsylla Hussain</i> (Iran), <i>Xenopsylla hutoni</i> (Iran), <i>Xenopsylla nubica</i> (Egypt, Iran, Saudi Arabia), <i>Xenopsylla nuttalli</i> (Iran), <i>Xenopsylla persica</i> (Iran), <i>Xenopsylla ramesis</i>                                                                                                                                                                                                                                                                        |

(Egypt, Israel, Lebanon), *Xenopsylla* spp. (Egypt, Iran, Israel, Saudi Arabia, Yemen), *Xenopsylla taractes* (Egypt)

---

**Supplementary Table S4c: Rodent lice reported in the Middle East**

---

**1. Family:** Hoplopleuridae (suborder: Anoplura)

*Hoplopleura acanthopus* (Iran), *Hoplopleura affinis* (Iran), *Hoplopleura captiosa* (Egypt, Iran), *Hoplopleura longula* (Iran), *Hoplopleura meridionidis* (Iran), *Hoplopleura oenomydis* (Egypt), *Hoplopleura pacifica* (Egypt), *Hoplopleura* spp. (Iran)

---

**2. Family:** Pediculidae (suborder: Anoplura)

*Pediculus affinis* (Iran), *Pediculus humanus* (Egypt)

---

**3. Family:** Polyplacidae (suborder: Anoplura)

*Eulinognathus aculeatus* (Iran), *Eulinognathus* sp. (Iran), *Neohaematopinus laeviusculus* (Iran), *Neohaematopinus* spp. (Iran), *Polyplax abyssinica* (Egypt), *Polyplax asiatica* (Iran), *Polyplax brachyrrhyncha* (Egypt, Iran), *Polyplax calomysci* (Iran), *Polyplax cannomydis* (Kuwait), *Polyplax gerbilli* (Iran, Israel), *Polyplax kaiseri* (Iran), *Polyplax oxyrrhyncha* (Egypt), *Polyplax paradoxa* (Iran), *Polyplax reclinate* (Iran), *Polyplax serrata* (Iran, Saudi Arabia), *Polyplax spinulosa* (Egypt, Iran, Kuwait, Palestine, Saudi Arabia), *Polyplax* spp. (Iran), *Polyplax stephensi* (Iran)

---

**Supplementary Table S4d: Rodent mites reported in the Middle East**

|                                                                                                                                                                                                                                                                                                                                                                                                                                                                                                                                                                                                                                                                                                                                                                                                                                                                                                                                                                                                                                                                                                                                                                                                                                                                                                                                                                                                                                                                                                                                                                                                                                                                             |
|-----------------------------------------------------------------------------------------------------------------------------------------------------------------------------------------------------------------------------------------------------------------------------------------------------------------------------------------------------------------------------------------------------------------------------------------------------------------------------------------------------------------------------------------------------------------------------------------------------------------------------------------------------------------------------------------------------------------------------------------------------------------------------------------------------------------------------------------------------------------------------------------------------------------------------------------------------------------------------------------------------------------------------------------------------------------------------------------------------------------------------------------------------------------------------------------------------------------------------------------------------------------------------------------------------------------------------------------------------------------------------------------------------------------------------------------------------------------------------------------------------------------------------------------------------------------------------------------------------------------------------------------------------------------------------|
| <b>1. Family: Acaridae</b><br><i>Tyrophagus</i> sp. (Egypt)                                                                                                                                                                                                                                                                                                                                                                                                                                                                                                                                                                                                                                                                                                                                                                                                                                                                                                                                                                                                                                                                                                                                                                                                                                                                                                                                                                                                                                                                                                                                                                                                                 |
| <b>2. Family: Cheyletidae</b><br><i>Cheyletus eruditus</i> (Egypt, Saudi Arabia), <i>Cheyletus</i> sp. (Egypt), <i>Cheyletus zaheri</i> (Egypt)                                                                                                                                                                                                                                                                                                                                                                                                                                                                                                                                                                                                                                                                                                                                                                                                                                                                                                                                                                                                                                                                                                                                                                                                                                                                                                                                                                                                                                                                                                                             |
| <b>3. Family: Demodicidae</b><br><i>Demodex aurati</i> (Turkey), <i>Demodex criceti</i> (Turkey)                                                                                                                                                                                                                                                                                                                                                                                                                                                                                                                                                                                                                                                                                                                                                                                                                                                                                                                                                                                                                                                                                                                                                                                                                                                                                                                                                                                                                                                                                                                                                                            |
| <b>4. Family: Dermanyssidae</b><br><i>Dermanyssus americanus</i> (Iran), <i>Dermanyssus gallinae</i> (Egypt, Iran), <i>Dermanyssus muris</i> (Iran, Yemen),<br><i>Dermanyssus sanguineus</i> (Egypt, Iran), <i>Dermanyssus</i> spp. (Egypt, Iran)                                                                                                                                                                                                                                                                                                                                                                                                                                                                                                                                                                                                                                                                                                                                                                                                                                                                                                                                                                                                                                                                                                                                                                                                                                                                                                                                                                                                                           |
| <b>5. Family: Haemogamasidae</b><br><i>Eulaelaps</i> spp. (Iran), <i>Eulaelaps stabularis</i> (Egypt, Iran, Turkey)                                                                                                                                                                                                                                                                                                                                                                                                                                                                                                                                                                                                                                                                                                                                                                                                                                                                                                                                                                                                                                                                                                                                                                                                                                                                                                                                                                                                                                                                                                                                                         |
| <b>6. Family: Hirstionyssidae</b><br><i>Hirstionyssus arcuatus</i> (Turkey), <i>Hirstionyssus carticulatus</i> (Israel), <i>Hirstionyssus eversmani</i> (Turkey),<br><i>Hirstionyssus isabellinus</i> (Egypt, Turkey), <i>Hirstionyssus</i> spp. (Iran, Turkey)                                                                                                                                                                                                                                                                                                                                                                                                                                                                                                                                                                                                                                                                                                                                                                                                                                                                                                                                                                                                                                                                                                                                                                                                                                                                                                                                                                                                             |
| <b>7. Family: Laelapidae</b><br><i>Androlaelaps androgynus</i> (Israel), <i>Androlaelaps centrocarpus</i> (Israel), <i>Androlaelaps hermaphrodita</i> (Iran),<br><i>Androlaelaps hirsuta</i> (Israel), <i>Androlaelaps insculptus</i> (Israel), <i>Androlaelaps marshalli</i> (Israel),<br><i>Androlaelaps tateronis</i> (Saudi Arabia), <i>Articholaelaps glasgowi</i> (Saudi Arabia), <i>Echinolaelaps echidninus</i><br>(Egypt, Iran, Saudi Arabia), <i>Haemogamasus horridus</i> (Turkey), <i>Haemogamasus kusumotoi</i> (Turkey),<br><i>Haemogamasus nidiformis</i> (Turkey), <i>Haemogamasus pontiger</i> (Egypt), <i>Haemogamasus</i> sp. (Iran),<br><i>Haemogamasus zachvatkini</i> (Turkey), <i>Haemolaelaps androgynus</i> (Turkey), <i>Haemolaelaps fahrenheitzi</i><br>(Turkey), <i>Haemolaelaps glasgowi</i> (Egypt, Iran, Turkey), <i>Haemolaelaps namrui</i> (Yemen), <i>Haemolaelaps</i><br>spp. (Egypt, Iran, Turkey), <i>Haemolaelaps zulu</i> (Egypt), <i>Hypoaspis astronomica</i> (Iran), <i>Hypoaspis koseii</i><br>(Egypt), <i>Hypoaspis miles</i> (Turkey), <i>Laelaps agilis</i> (Turkey), <i>Laelaps algericus</i> (Turkey), <i>Laelaps</i><br><i>ciccuminata</i> (Iran), <i>Laelaps hilaris</i> (Turkey), <i>Laelaps jettmari</i> (Turkey), <i>Laelaps keegani</i> (Egypt), <i>Laelaps</i><br><i>kochi</i> (Turkey), <i>Laelaps longisetosus</i> (Turkey), <i>Laelaps nuttalli</i> (Egypt, Iran, Kuwait, Saudi Arabia,<br>Yemen)), <i>Laelaps pavlovskyi</i> (Turkey), <i>Laelaps sinai</i> (Egypt), <i>Laelaps</i> spp. (Iran), <i>Myonyssus decumani</i><br>(Turkey), <i>Myonyssus gigas</i> (Turkey), <i>Paracheylelaps pyriformis</i> (Iran) |
| <b>8. Family: Leeuwenhoeekiidae</b><br><i>Multisetosa persicus</i> (Iran), <i>Shunsennia oudemansi</i> (Iran)                                                                                                                                                                                                                                                                                                                                                                                                                                                                                                                                                                                                                                                                                                                                                                                                                                                                                                                                                                                                                                                                                                                                                                                                                                                                                                                                                                                                                                                                                                                                                               |
| <b>9. Family: Listrophoridae</b><br><i>Listrophorus arishi</i> (Egypt)                                                                                                                                                                                                                                                                                                                                                                                                                                                                                                                                                                                                                                                                                                                                                                                                                                                                                                                                                                                                                                                                                                                                                                                                                                                                                                                                                                                                                                                                                                                                                                                                      |
| <b>10. Family: Macrochelidae</b><br><i>Macrocheles muscaedomestica</i> (Turkey), <i>Macrocheles</i> spp. (Iran)                                                                                                                                                                                                                                                                                                                                                                                                                                                                                                                                                                                                                                                                                                                                                                                                                                                                                                                                                                                                                                                                                                                                                                                                                                                                                                                                                                                                                                                                                                                                                             |
| <b>11. Family: Macronyssidae</b><br><i>Ornithonyssus bacoti</i> (Egypt, Iran, Kuwait, Saudi Arabia, Turkey), <i>Ornithonyssus</i> spp. (Egypt, Iran,<br>Saudi Arabia), <i>Ornithonyssus sylviarum</i> (Egypt, Iran)                                                                                                                                                                                                                                                                                                                                                                                                                                                                                                                                                                                                                                                                                                                                                                                                                                                                                                                                                                                                                                                                                                                                                                                                                                                                                                                                                                                                                                                         |
| <b>12. Family: Myobiidae</b><br><i>Myobia murismusculi</i> (Iran), <i>Myobia</i> sp. (Egypt), <i>Radfordia acomys</i> (Iran), <i>Radfordia affinis</i> (Iran),<br><i>Radfordia dyromys</i> (Iran), <i>Radfordia ensifera</i> (Egypt), <i>Radfordia merioni</i> (Iran), <i>Radfordia persica</i> (Iran),<br><i>Radfordia</i> sp. (Egypt)                                                                                                                                                                                                                                                                                                                                                                                                                                                                                                                                                                                                                                                                                                                                                                                                                                                                                                                                                                                                                                                                                                                                                                                                                                                                                                                                     |
| <b>13. Family: Myocoptidae</b><br><i>Myocoptes musculus</i> (Iran), <i>Trichoecius calomysci</i> (Iran), <i>Trichoecius</i> sp. (Egypt)                                                                                                                                                                                                                                                                                                                                                                                                                                                                                                                                                                                                                                                                                                                                                                                                                                                                                                                                                                                                                                                                                                                                                                                                                                                                                                                                                                                                                                                                                                                                     |

---

**14. Family: Oribatulidae**

*Zygoribatula* sp. (Egypt)

---

**15. Family: Trombiculidae**

*Ascoschoengastia browni* (Saudi Arabia), *Brunehaldia iranica* (Iran), *Brunehaldia lucida* (Iran), *Brunehaldia sylvatica* (Iran), *Cheladonta afshari* (Iran), *Cheladonta firdousii* (Iran), *Cheladonta iraniensis* (Iran), *Dolosisia skljar* (Iran), *Ericotrombidium caucasicum* (Saudi Arabia), *Ericotrombidium galliardi* (Saudi Arabia), *Ericotrombidium kazeruni* (Saudi Arabia), *Euschoengastia meshhedensis* (Iran), *Helenicula lukshumiae* (Saudi Arabia), *Helenicula sparsa* (Iran), *Hirsutiella alpine* (Iran), *Kepkatrombicula brevis* (Iran), *Kepkatrombicula magna* (Iran), *Leptotrombidium noxium* (Iran), *Leptotrombidium raropinne* (Iran), *Leptotrombidium silvaticum* (Iran), *Leptotrombidium subsilvaticum* (Iran), *Microtrombicula centropi* (Saudi Arabia), *Microtrombicula hoogstraali* (Saudi Arabia, Yemen), *Microtrombicula hyraci* (Saudi Arabia), *Microtrombicula microscuta* (Saudi Arabia), *Microtrombicula muhaylensis* (Saudi Arabia), *Microtrombicula traubi* (Iran, Saudi Arabia), *Miyatrombicula ramitensis* (Iran), *Neoschongastia yemenensis* (Yemen), *Neotrombicula aideriensis* (Iran), *Neotrombicula autumnalis* (Iran), *Neotrombicula delijani* (Iran), *Neotrombicula elegans* (Iran), *Neotrombicula faghihi* (Turkey), *Neotrombicula lazistanica* (Turkey), *Neotrombicula lubrica* (Iran), *Neotrombicula monticola* (Iran), *Neotrombicula rostrata* (Iran), *Neotrombicula sabzavari* (Turkey), *Neotrombicula saperoi* (Yemen), *Neotrombicula subtilis* (Turkey), *Neotrombicula talmiensis* (Iran), *Neotrombicula tehranensis* (Iran), *Neotrombicula turkestanica* (Iran), *Neotrombicula vernalis* (Iran), *Neotrombicula vulgaris* (Iran), *Pentidionis agamae* (Saudi Arabia), *Walchia cognata* (Iran), *Walchia parvula* (Saudi Arabia)

---

**16. Family: Walchiidae**

*Gahrlipeia lawrencei* (Saudi Arabia), *Schoengastiella wanson* (Saudi Arabia), *Schoutedenichia angusta* (Iran), *Schoutedenichia asirensis* (Saudi Arabia), *Schoutedenichia Saudi* (Saudi Arabia), *Schoutedenichia thracica* (Saudi Arabia), *Schoutedenichia zarudnyi* (Saudi Arabia)

---

**Supplementary table S4e: Rodent ticks reported in the Middle East**

|                                                                                                                                                                                                                                                                                                                                                                                                                                                                                                                                                                                                                                                                                                                                                                                                                                                                                                                                                                                                                                                                                                          |
|----------------------------------------------------------------------------------------------------------------------------------------------------------------------------------------------------------------------------------------------------------------------------------------------------------------------------------------------------------------------------------------------------------------------------------------------------------------------------------------------------------------------------------------------------------------------------------------------------------------------------------------------------------------------------------------------------------------------------------------------------------------------------------------------------------------------------------------------------------------------------------------------------------------------------------------------------------------------------------------------------------------------------------------------------------------------------------------------------------|
| 1. <b>Family:</b> Argasidae (Soft tick)                                                                                                                                                                                                                                                                                                                                                                                                                                                                                                                                                                                                                                                                                                                                                                                                                                                                                                                                                                                                                                                                  |
| Ornithodoros sp. (Iran)                                                                                                                                                                                                                                                                                                                                                                                                                                                                                                                                                                                                                                                                                                                                                                                                                                                                                                                                                                                                                                                                                  |
| 2. <b>Family:</b> Ixodidae (Hard tick)                                                                                                                                                                                                                                                                                                                                                                                                                                                                                                                                                                                                                                                                                                                                                                                                                                                                                                                                                                                                                                                                   |
| <i>Amblyomma</i> sp. (Egypt), <i>Boophilus annulatus</i> (Iran), <i>Boophilus</i> sp. (Iran), <i>Dermacentor marginatus</i> (Turkey), <i>Haemaphysalis leachi</i> (Yemen), <i>Haemaphysalis punctata</i> (Iran), <i>Haemaphysalis</i> spp. (Iran, Israel, Turkey, Yemen), <i>Hyalomma asiaticum</i> (Iran), <i>Hyalomma dromedarii</i> (Egypt), <i>Hyalomma excavatum</i> (Egypt), <i>Hyalomma impeltatum</i> (Israel, Saudi Arabia), <i>Hyalomma Koch</i> (Iran), <i>Hyalomma rhipicephaloides</i> (Egypt), <i>Hyalomma savignyi</i> (Israel), <i>Hyalomma</i> spp. (Egypt, Iran, Saudi Arabia), <i>Ixodes eldaricus</i> (Israel), <i>Ixodes laguri</i> (Turkey), <i>Ixodes redikorzevi</i> (Iran, Turkey), <i>Ixodes</i> spp. (Iran, Turkey, Yemen), <i>Ixodes trianguliceps</i> (Iran), <i>Rhipicephalus bursa</i> (Iran), <i>Rhipicephalus camicasi</i> (Saudi Arabia), <i>Rhipicephalus sanguineus</i> (Egypt, Israel, Saudi Arabia), <i>Rhipicephalus simus</i> (Yemen), <i>Rhipicephalus</i> spp. (Egypt, Iran, Saudi Arabia, Yemen), <i>Rhipicephalus turanicus</i> (Iran, Israel, Saudi Arabia) |
