# Supplementary material for: Rodent Ectoparasites in the Middle East: A Systematic Review and Meta-Analysis
Source: MDPI journal article supplement (doi:10.3390/pathogens10020139), 2021-01-31
Supplement: s1 [file s1]

# Rodent Ectoparasites in the Middle East: A Systematic Review and Meta-Analysis

Supplementary figures S1: Funnel plots of overall rodent ectoparasite prevalence and subgroup analysis

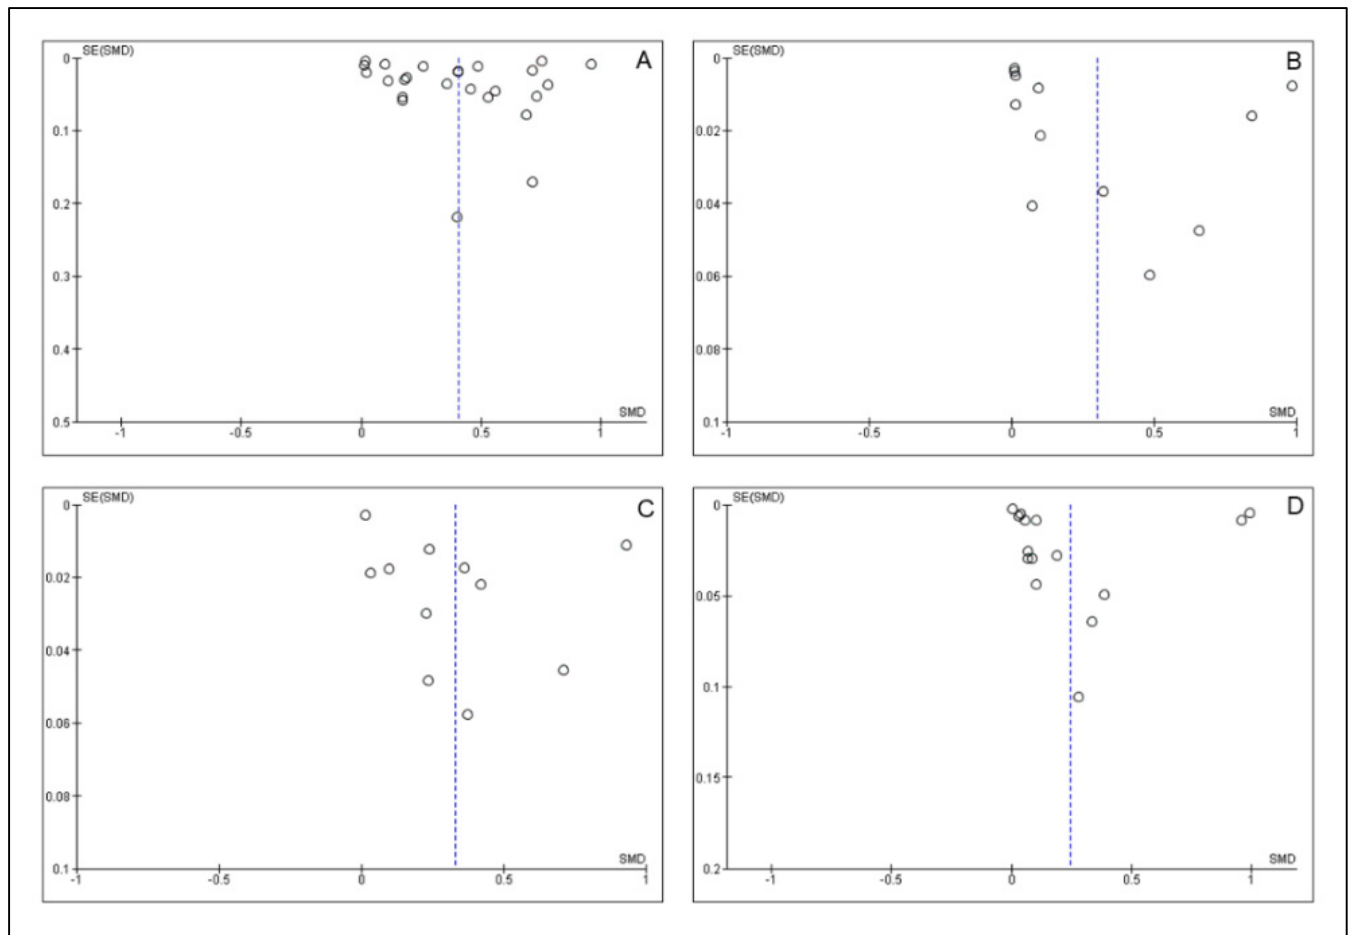

**Supplementary figure S1a:** Funnel plots of overall rodent ectoparasite prevalence; A: Fleas, B: Lice, C: Mites, and D: Ticks.



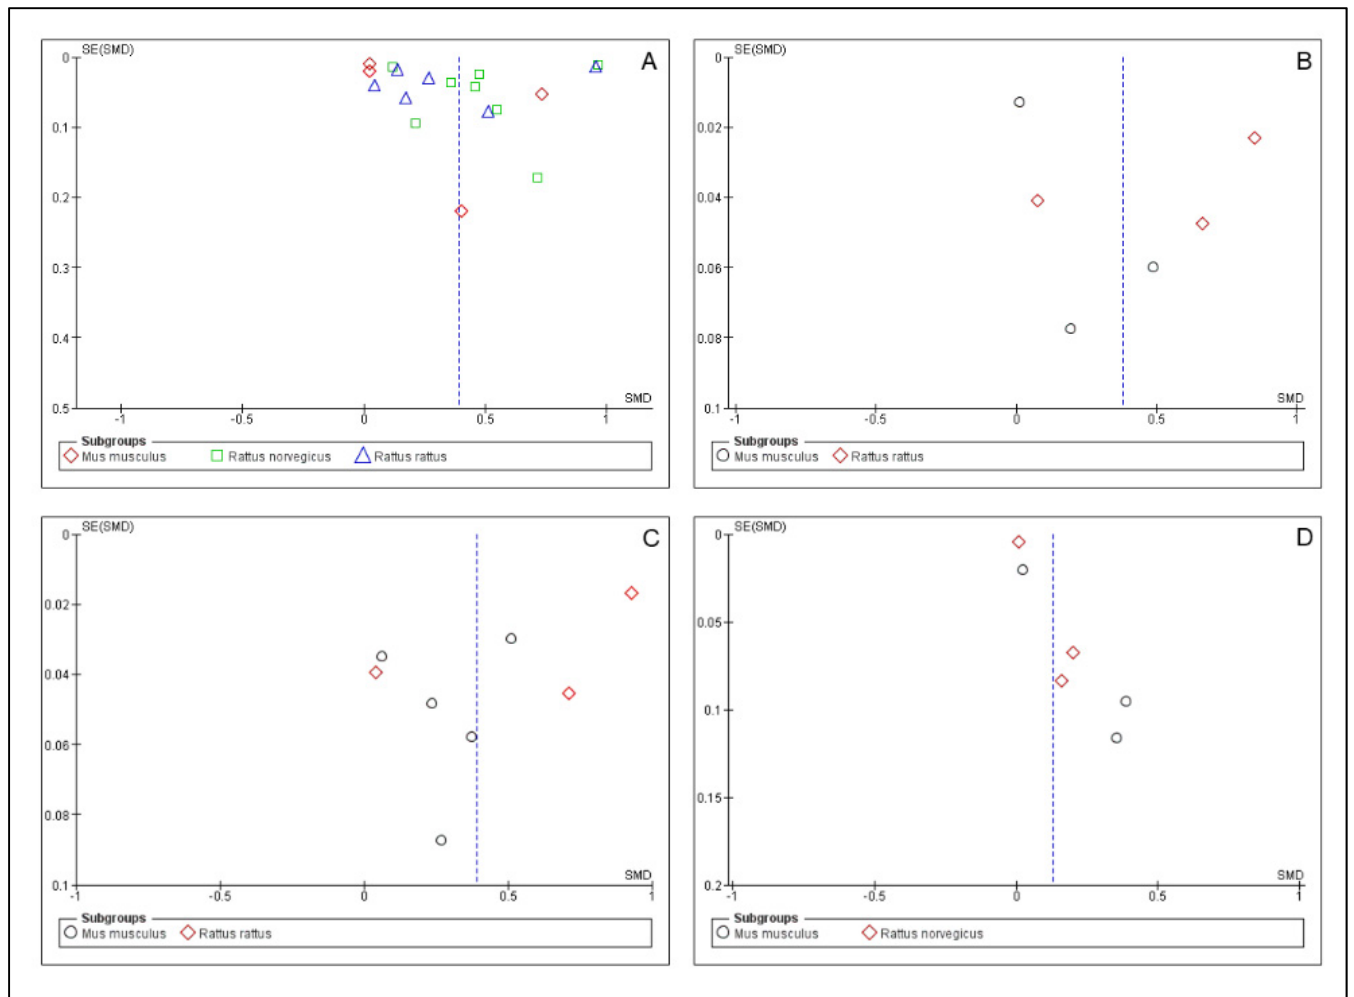

**Supplementary figure S1c:** Funnel plots of rodent host species wise overall ectoparasite prevalence; A: Fleas, B: Lice, C: Mites, and D: Ticks
